# Supplementary material for: Observational evidence of wildfire-promoting soil moisture anomalies
Source: PubMed Central journal article supplement (PMC7335103; doi:10.1038/s41598-020-67530-4), 2020-07-03
Supplement: 41598_2020_67530_MOESM1_ESM.pdf [file 41598_2020_67530_MOESM1_ESM.pdf]

Supplementary material for

**Observational evidence of wildfire-promoting soil moisture anomalies**

Sungmin O<sup>1</sup>, Xinyuan Hou<sup>1</sup>, and Rene Orth<sup>1</sup>

<sup>1</sup>Max Planck Institute for Biogeochemistry, D-07745 Jena, Germany

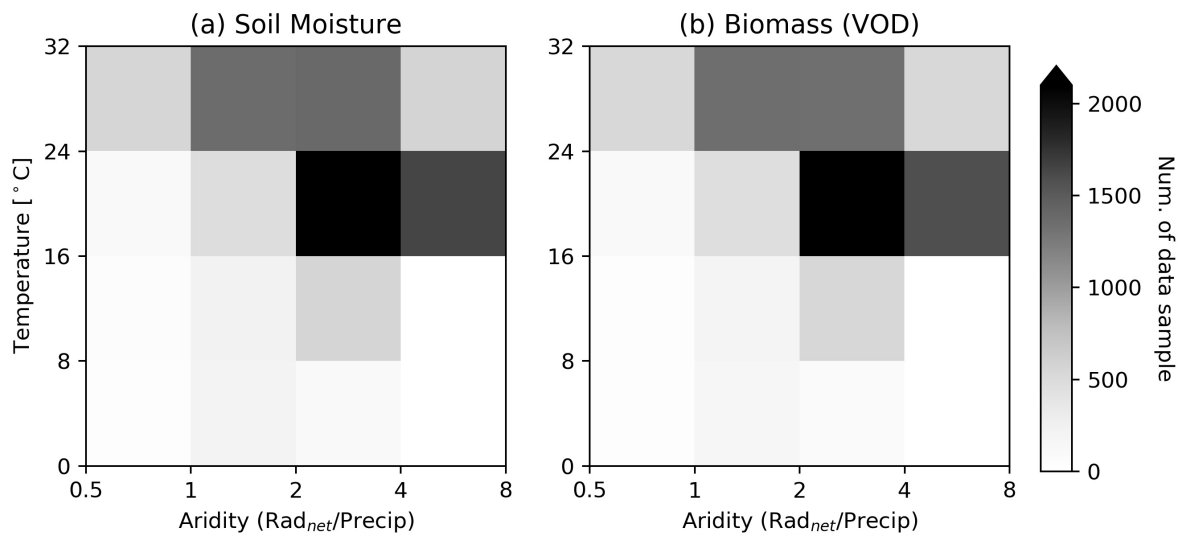

Figure S1: The number of grid cells within each hydro-climatic regime used in Figs. 2 and S2.

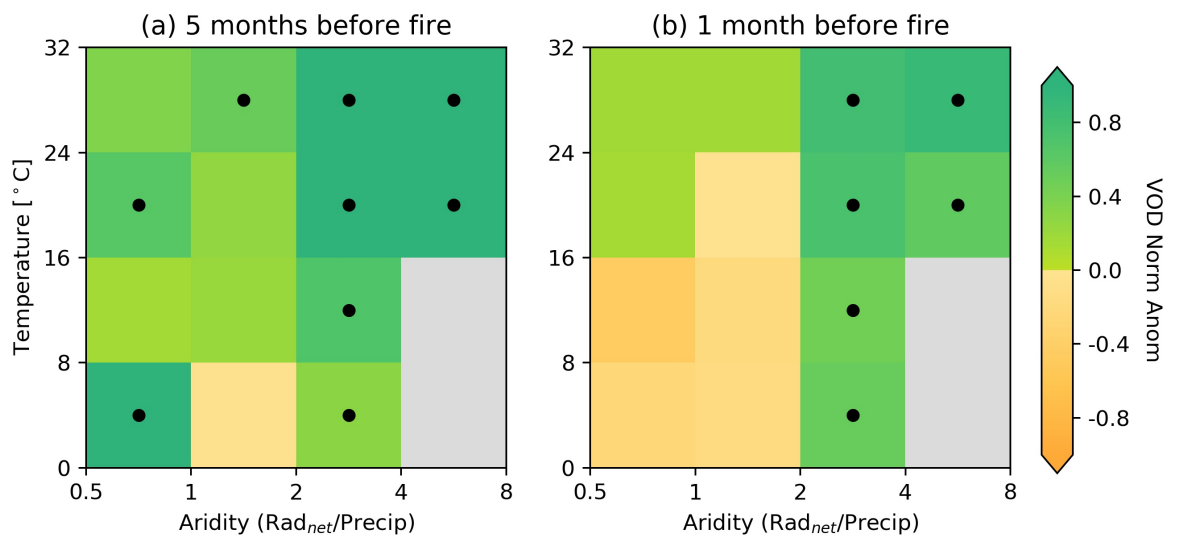

Figure S2: Similar to Fig. 2, but for normalised VOD anomalies. The VOD X-band product from Moesinger et al. (2020) is used.

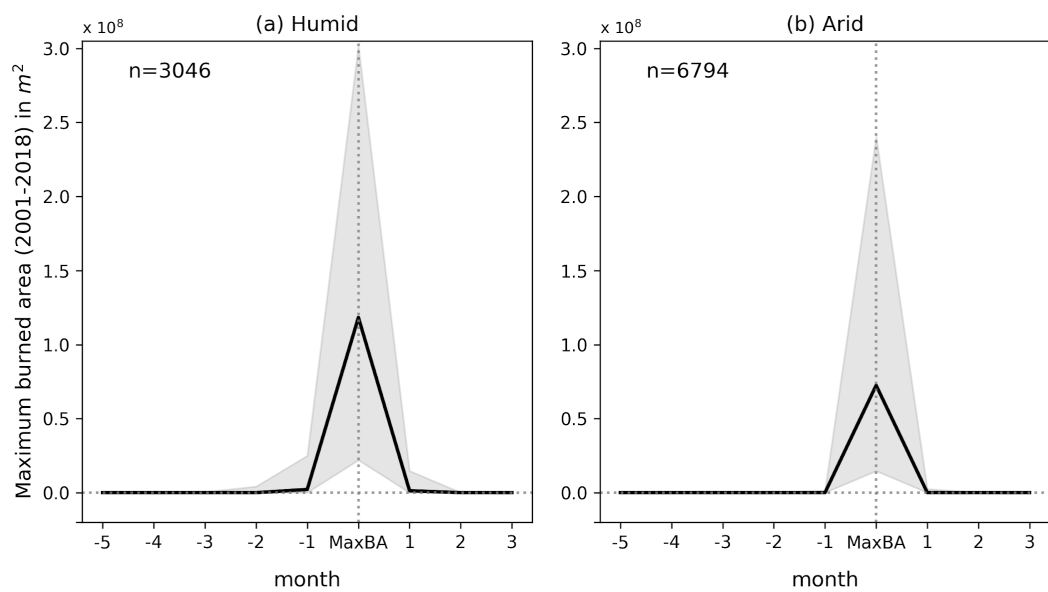

Figure S3: Similar to Fig. 3, but for maximum burned area.

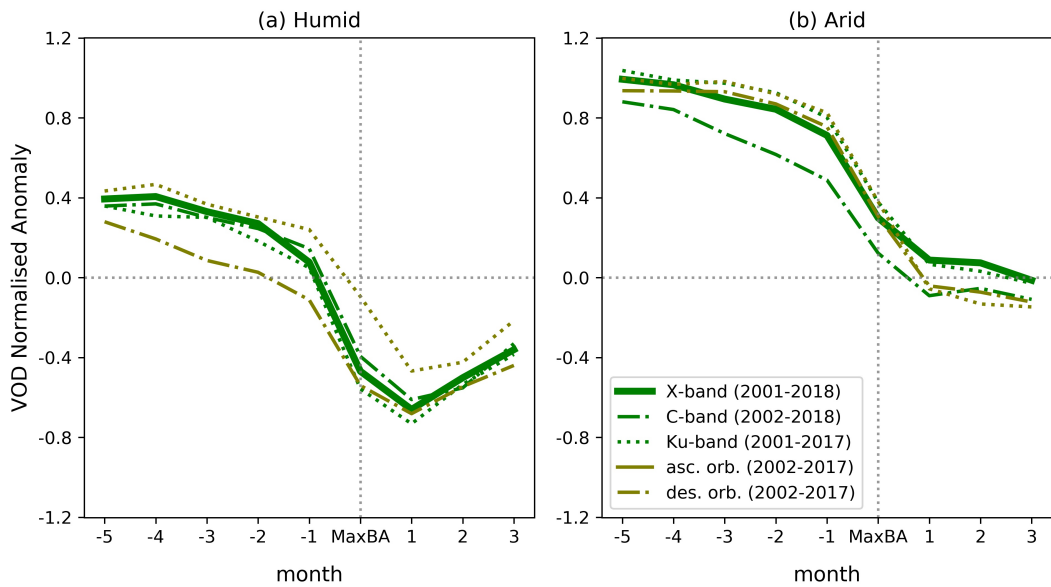

Figure S4: Similar to Fig. 3, but with different VOD products. The thick green line indicates the VOD results shown in Fig. 3, which represent X-band VOD from Moesinger et al. (2020). Ku-Band and C-band VOD from the same product are also shown. In addition, ascending and descending-orbit VOD from multiple sensors processed by Du et al. (2017) are shown. Note that the products are available for slightly different time periods.

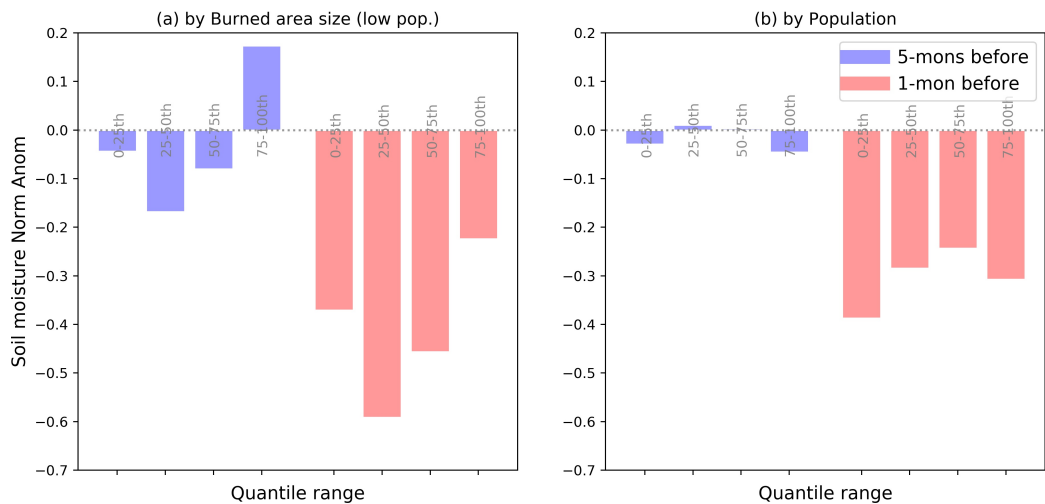

Figure S5: Similar to Fig. 4, but for humid regions with aridity  $\leq 2$ .
